# Supplementary material
Source: Springer Nature journal article supplement (https://www.springermedizin.de/resource/supplementary/12979_2012_157_MOESM2_ESM.pdf/9603102)
Supplement: MOESM2 [file 9603102]

**Group and  
equivalent  
volume of blood  
injected**

**Old C57BL/6  
Mice**

**Treatment**

**Group 1**  
PBS

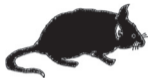

**Group 2**  
≡ 100μl

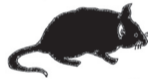

**Group 3**  
≡ 250μl

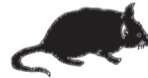

**Group 4**  
≡ 500μl

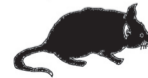

Vaccination with  
formalin inactivated  
virus A/PR/8

Challenge with  
live A/PR/8 virus

3 doses

Analysis

3 weeks

2 weeks

3 weeks

9 days
